# Supplementary material
Source: Springer Nature journal article supplement (https://www.springermedizin.de/resource/supplementary/12984_2009_228_MOESM1_ESM.pdf/9605572)

## A Electrode Placement

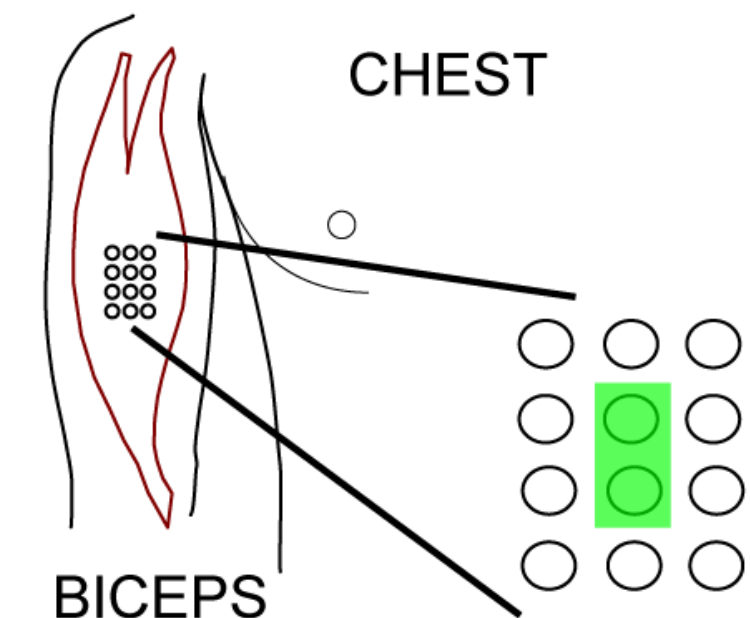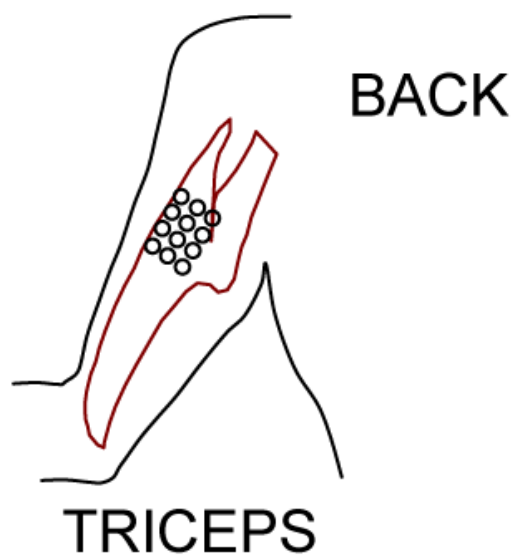

## B Experimental Apparatus

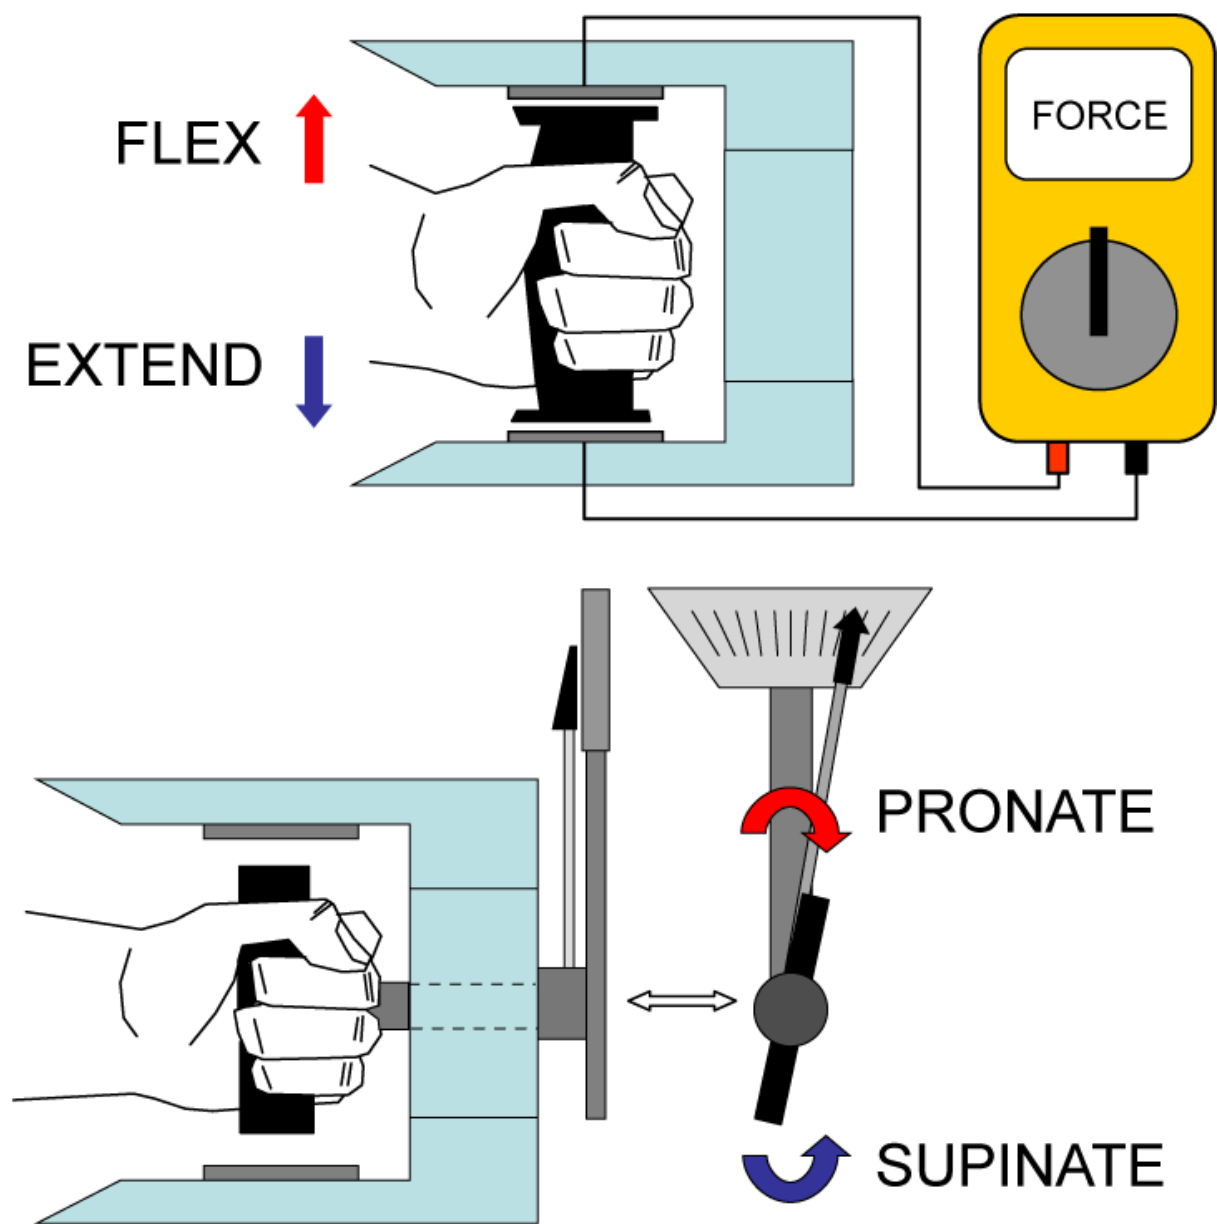

Supplement: MOESM1 [file 9605572]
